# Supplementary material for: Physicochemical Properties and Transdermal Absorption of a Flurbiprofen and Lidocaine Complex in the Non-Crystalline Form
Source: MDPI journal article supplement (doi:10.3390/pharmaceutics15020318), 2023-01-18
Supplement: s1 [file s1]

# Supplementary Materials: Physicochemical Properties and Transdermal Absorption of a Flurbiprofen and Lidocaine Complex in the Non-Crystalline Form

Qihui Xu <sup>1,†</sup>, Takayuki Furuishi <sup>1,\*</sup>, Kaori Fukuzawa <sup>1,2</sup> and Etsuo Yonemochi <sup>1,\*</sup>

<sup>1</sup> Department of Physical Chemistry, School of Pharmacy and Pharmaceutical Sciences, Hoshi University, 2-4-41 Ebara, Shinagawa-ku, Tokyo 142-8501, Japan; d2081@hoshi.ac.jp (Q.X.); fukuzawa-k@phs.osaka-u.ac.jp (K.F.)

<sup>2</sup> Graduate School of Pharmaceutical Sciences, Osaka University, 1-6 Yamadaoka, Suita 565-0871, Japan

\* Correspondence: t-furuishi@hoshi.ac.jp (T.F.); e-yonemochi@hoshi.ac.jp (E.Y.)

† These authors contributed equally to this work.

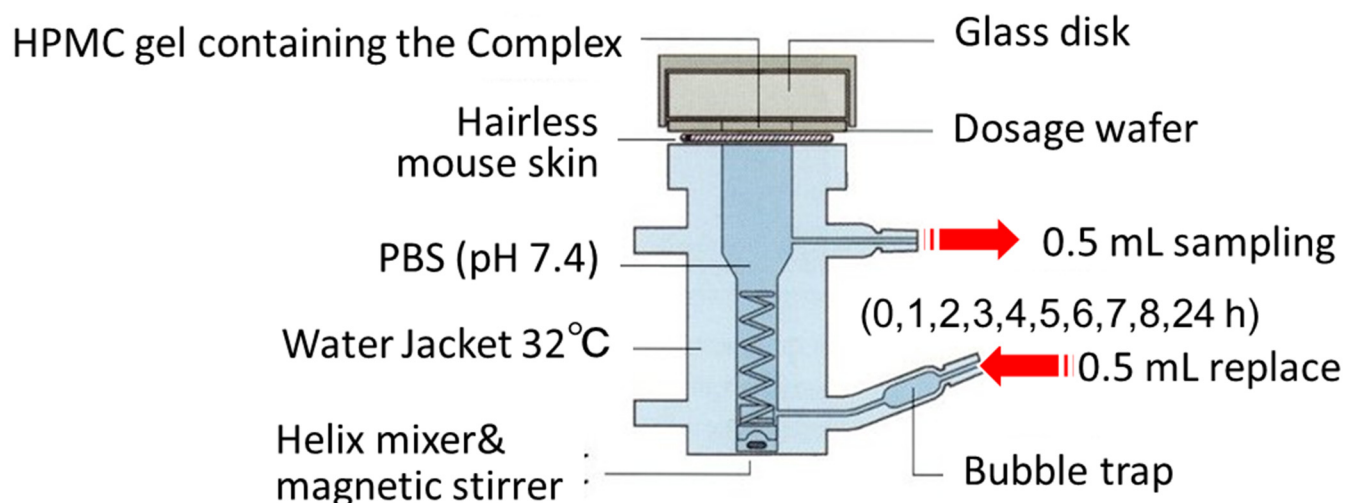

**Figure S1.** Diagrammatic representation of a Franz diffusion cell used in this study.

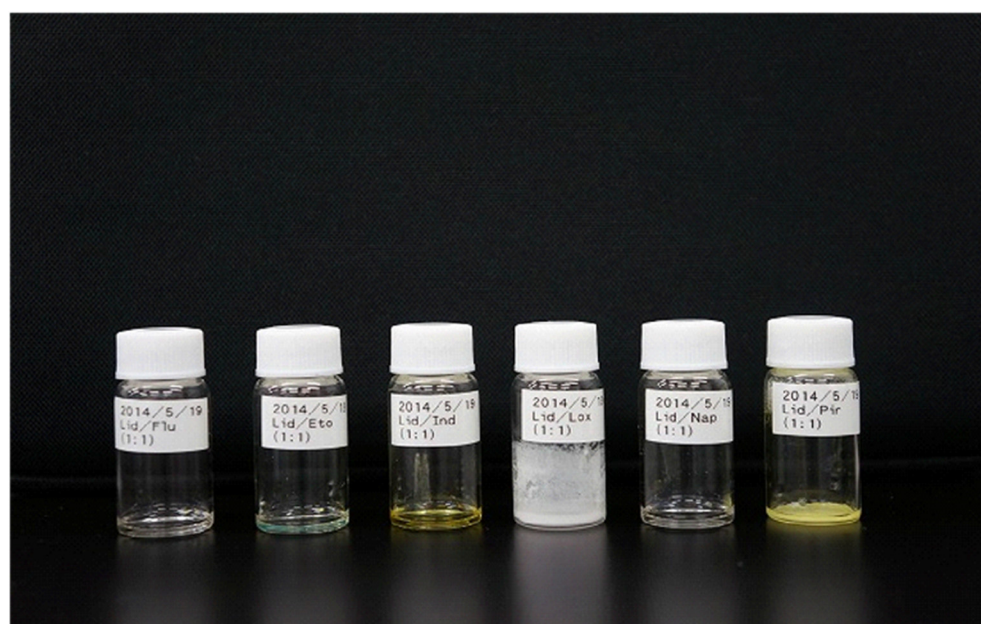

**Figure S2.** Appearance of various NSAIDs and LDC complex.

**Table S1.** Flux and Lag time derived from cumulative amount and time curve of 2% HPMC gel.

|                        | Flux<br>( $\mu\text{g}/\text{cm}^2/\text{h}$ ) | Lag time<br>(h) | Cumulative amount<br>permeated<br>( $\mu\text{g}/\text{cm}^2$ ) |
|------------------------|------------------------------------------------|-----------------|-----------------------------------------------------------------|
| Lidocaine (LDC-FLU)    | 18.40 $\pm$ 2.12                               | 0.84 $\pm$ 0.36 | 307.20 $\pm$ 98.40                                              |
| Flurbiprofen (LDC-FLU) | 30.10 $\pm$ 0.63                               | 1.75 $\pm$ 0.15 | 572.60 $\pm$ 146.22                                             |
| Lidocaine alone        | 36.20 $\pm$ 2.26                               | 0.47 $\pm$ 0.25 | 387.63 $\pm$ 71.12                                              |
| Flurbiprofen alone     | 7.98 $\pm$ 1.99                                | 1.11 $\pm$ 0.37 | 172.61 $\pm$ 57.90                                              |

**Table S2.** Flux and Lag time derived from cumulative amount and time curve of white petrolatum.

|                        | Flux<br>( $\mu\text{g}/\text{cm}^2/\text{h}$ ) | Lag time<br>(h) | Cumulative amount<br>permeated<br>( $\mu\text{g}/\text{cm}^2$ ) |
|------------------------|------------------------------------------------|-----------------|-----------------------------------------------------------------|
| Lidocaine (LDC-FLU)    | 2.49 $\pm$ 0.58                                | 0.87 $\pm$ 0.19 | 32.24 $\pm$ 12.21                                               |
| Flurbiprofen (LDC-FLU) | 4.32 $\pm$ 0.22                                | 0.85 $\pm$ 0.34 | 54.83 $\pm$ 2.36                                                |
| Lidocaine alone        | 4.46 $\pm$ 0.59                                | 0.36 $\pm$ 0.58 | 65.02 $\pm$ 10.63                                               |
| Flurbiprofen alone     | 2.16 $\pm$ 0.78                                | 0.98 $\pm$ 0.16 | 25.31 $\pm$ 19.82                                               |
